# Supplementary material for: Predictors of Opioid Use in Individuals with Pain
Source: Research Square preprint supplement (doi:10.21203/rs.3.rs-7538834/v1), 2025-09-19
Supplement: Supplementary file 1 [file b4452a2c66aac454544bcbe1.pdf]

**Title:** Predictors of Opioid Use in Individuals with Pain

**Authors:** Azin Zare<sup>1,2</sup>, Matt Fillingim<sup>1,3</sup>, Christophe Tanguay-Sabourin<sup>1,3,4</sup>, Gianluca Guglietti<sup>1,3</sup>, Jax Norman<sup>1,2</sup>, Lindsay Neuert<sup>1,2</sup>, Lise Hobeika<sup>1,5,6</sup>, Marc O. Martel<sup>1,2,3</sup>, Etienne Vachon-Pressseau<sup>1,2,3</sup>

**Affiliations:**

1. Alan Edwards Centre for Research on Pain, McGill University, Montreal, Quebec, Canada
2. Faculty of Dental Medicine and Oral Health Sciences, McGill University, Montreal, Quebec, Canada
3. Department of Anaesthesia, Faculty of Medicine and Health Sciences, McGill University, Montreal, Quebec, Canada
4. Faculty of Medicine, Université de Montréal, Montreal, Quebec, Canada
5. Université Paris Cité, Institut Pasteur, AP-HP, INSERM, CNRS, Fondation Pour l'Audition, Institut de l'Audition, IHU reConnect, Paris, France.
6. Sorbonne Université, Institut du Cerveau—Paris Brain Institute—ICM, INSERM, CNRS, APHP, Hôpital de la Pitié Salpêtrière, Paris, France.

Corresponding authors:

Azin Zare: [azin.zare@mcgill.ca](mailto:azin.zare@mcgill.ca);

Etienne Vachon-Pressseau: [etienne.vachon-presseau@mcgill.ca](mailto:etienne.vachon-presseau@mcgill.ca)

## Supplementary methods

### UK Biobank

The UK Biobank (UKBB) is a large-scale, prospective and ongoing study designed to investigate genetic factors and lifestyle determinants of a wide range of diseases in middle-aged and older adults. To reach its target sample size of ~500,000 participants, more than 9 million invitations were sent to UK National Health Service (NHS) registrants aged 40–69 years who lived within a reasonable distance of an assessment center. Baseline recruitment and data collection were conducted between 2006 and 2010, with 502,494 participants consenting to join the study across 22 assessment centers in Scotland, England, and Wales <sup>1</sup>.

Following the baseline phase, subsets of participants were invited for follow-up visits. This study uses datasets collected at the baseline in-person assessment visit (2006–2010) and the 9-year follow-up visit (2014–2020). During the baseline in-person assessment visit, data were collected from 503,317 participants through touchscreen questionnaires covering sociodemographic, lifestyle, psychosocial factors, and health history, as well as verbal interviews conducted by trained nurses on early life factors, employment, medical conditions, and medications. Physical measurements and biological samples were also obtained. During the follow-up visit around 9 years later a subset of 49,001 participants underwent brain scans and completed the same touchscreen questionnaires as in the baseline visit.

#### *Participants with pain*

Participants were asked whether they experienced any of the following pain conditions in the past month that interfered with their usual activities: "headache," "facial pain," "neck or shoulder pain," "back pain," "stomach or abdominal pain," "hip pain," "knee pain," "pain all over the body," or "prefer not to answer" (data-field: 6159). Selecting "pain all over the body" was exclusive, preventing the selection of other options. If participants reported experiencing pain, they were further asked whether the pain persisted for more than three months. Based on the International Association for the Study of Pain (IASP) criteria <sup>2</sup>, those reporting pain lasting more than three months at any site were classified as having "chronic pain." In contrast, participants who reported pain at one of the seven regional sites but indicated it lasted less than three months were classified as experiencing "acute pain."

Participants were asked whether a doctor had ever diagnosed them with cancer (data-field 2453). Those responding “yes” completed a verbal interview with a trained nurse to provide details on the number of self-reported cancer diagnoses (data-field 134). Participants with cancer were excluded from the analyses.

### *Opioid use*

Medication use was self-reported by participants at both the baseline and follow-up visits, defined as the regular use of prescription drugs—taken on most days of the week over the past four weeks (data-field: 2492). Following this, participants were interviewed by a trained nurse, who recorded the names of the medications used (data-field: 20003), using either the generic or trade names provided. This assessment captured only regular, ongoing medications and did not include short-term or as-needed treatments.

For this study, the recorded medications were classified using the Anatomical Therapeutic Chemical (ATC) classification system developed by the World Health Organization (WHO)<sup>3</sup>. The coding approach followed the stratification used by Wu et al. (2019)<sup>4</sup>, with a focus on ATC code N02A (opioid analgesics). To ensure broader coverage of relevant opioid-containing compounds, we also included ATC code R05DA04 (codeine). Opioid use was identified at each time point using medications classified under either of these two ATC codes. A full list of included medications is presented in Supplementary Table 1.

### *Medical diagnoses*

The UKBB provides curated data fields identifying the earliest recorded instance of diagnostic codes (Category ID: 1712) derived from self-reports, primary care, hospital inpatient records, and death registries. These diagnoses are mapped to three-digit ICD-10 codes and organized into 16 subcategories corresponding to ICD-10 chapters (Chapters I–XVII, excluding Chapter II: Neoplasms). To determine whether a diagnosis predated a study visit, we compared the date of first recorded diagnosis to the participant’s visit date at both baseline and 9-year follow-up. For this study, 15 of the 16 categories were included; the congenital and chromosomal abnormalities category was excluded due to limited sample size.

### *Opioid-related disorders*

Opioid-related disorders were identified using ICD-10 code F11, corresponding to mental and behavioral disorders due to opioid use.

#### *Exclusion and inclusion criteria*

Responses coded as “prefer not to answer” or “do not know” were recoded as missing values. Participants with more than 20% missing data in selected features used to train our models at baseline, or missing data on pain location, were excluded to ensure accurate classification of pain sites (< 2.5% of participants). The study focused exclusively on individual with chronic non-cancer pain (CNCP). To enhance generalizability, no other exclusion criteria were applied, resulting in a final sample of 195,756 participants.

#### **All of Us Research Program**

The All of Us Research Program (AoU) aims to enroll at least one million diverse participants across the United States, with a strong emphasis on including individuals from populations historically underrepresented in biomedical research. The data integrates participant-reported data from multiple surveys—including basic demographic questionnaires, the COVID-19 Participant Experience (COPE) survey, and the Overall Health Questionnaire, alongside physical measurements and electronic health record (EHR) data encompassing clinically diagnosed medical conditions. For this study, we used data from the Registered and Controlled Tier Dataset the available through the AoU Researcher Workbench. To be included in the out analysis, participants were required to meet the following criteria: 1. Completion of the Overall Health Questionnaire, and 2. Completion of the COVID-19 Participant Experience (COPE) survey.

#### *Participants with pain*

Pain-related information was collected via the Overall Health Questionnaire, which covers topics such as general health, daily activities, and women’s health. Participants were asked “In the past 7 days, how would you rate your pain on average?”, with responses recorded on a numerical scale from 0 (no pain) to 10 (worst pain imaginable). These variables were respectively used to train non-pain and pain models, as reported in **Figure 2**.

#### *Opioid use*

Opioid use was assessed using the COPE survey, which aimed to capture how participants' experiences and health were affected during the COVID-19 pandemic. Respondents were asked: “In the past month, have you used any of the following drugs? Select all that apply.” Options included: “Prescription opioids (for example, fentanyl, oxycodone [OxyContin, Percocet], hydrocodone [Vicodin], methadone, buprenorphine, etc).”

### *Opioid misuse*

Following the opioid use item in the COPE survey, participants were asked: “Did you use prescription opioids in any way a doctor did not direct you to use it?” A “yes” response was classified as opioid misuse within the AoU cohort.

### *Opioid-related disorders*

Participants with opioid use disorder were identified based on EHR-confirmed diagnoses. Diagnoses were determined according to SNOMED-CT (Systematized Nomenclature of Medicine – Clinical Terms) codes related to opioid-related disorders.

## **Machine learning analyses**

In the UK Biobank, the sample was divided into a training set of 178,715 participants and a testing set of 17,041 participants with longitudinal follow-up data. Models were trained on the training set, while the testing set was held out to evaluate performance in out-of-sample participants. The longitudinal data also enabled assessment of whether the models could predict opioid initiation and discontinuation at follow-up. The All of Us Research Program served as an external validation cohort, where models were trained using the cross-validation procedure described below. Unlike the UK Biobank, no participants were held out for longitudinal analyses. The pain and non-pain variables used to train the models are described in the **Supplementary Table 3** for the UKBiobank and **Supplementary Table 4** for the All of Us Research Program.

Statistical analyses were conducted using Python 3.8.8 and R 4.1.1. Predictive machine learning models, including cross-validated Lasso regression, were developed to predict opioid use. Lasso regression was used for variable selection and to prevent multicollinearity by shrinking coefficients towards zero, simplifying the model while minimizing prediction error. The shrinkage strength was controlled by the alpha parameter, excluding unnecessary variables. Features were

resampled using the Synthetic Minority Oversampling Technique (SMOTE) to address data imbalance. Each model underwent 5 iterations with unique random states (5-times repeated 5-fold nested cross-validation) to ensure reliability, and confidence intervals for model performance metrics were calculated.

Model evaluation involved calculating AUC scores, log-probabilities of predictions, and ROC curves for each cross-validation fold. Mean true positive rates (TPRs) were interpolated to a standard false positive rate (FPR) grid for visualization. Coefficients and AUC scores were aggregated across iterations to summarize overall model performance in left out participants. We used bootstrap resampling with 1,000 iterations to indicate the estimated error in the Cohen's  $d$  and ROC-AUC effect sizes.

#### *Structure coefficients*

To address potential instability and bias in feature weights from multivariate models, we used structure coefficients to identify features individually linked to opioid use. These coefficients reflect the individual association of features. For each participant, structure coefficients were calculated by correlating the predicted probabilities from the logistic regression model with the actual values.

#### *Pseudo R-squared ( $R^2$ )*

To evaluate the relative contribution of different feature domains in predicting opioid-related outcomes, we computed the pseudo R-squared (McFadden's  $R^2$ ) for each domain-specific model. The 36 selected non-pain features were categorized into eight domains as: functional factors, socioeconomic, mood, substance use, sleep, demographic, occupational, neuroticism. Domain-specific models were fit separately using only the features corresponding to each domain.

#### *Deviance explained*

Deviance explained ( $D^2$ ) was used to quantify the extent to which pain and non-pain predictors, individually and jointly, accounted for variance in opioid use as the primary outcome of interest. Predicted probabilities were derived from logistic regression models trained on three sets of predictors: pain, non-pain, and a combination of both. Each model's deviance was calculated by comparing its fit to that of a hypothetical model with perfect fit to the observed data.

The deviance explained was then computed by normalizing each model's deviance against that of a null model containing only an intercept, which served as a baseline representing no predictive value. This approach followed a modified version of the methodology described by Dinga et al. (2020) <sup>5</sup>.

To disentangle the contributions of each feature set, the unique deviance explained was computed as the additional variance explained by one set of predictors beyond what was accounted for by the other. The shared contribution reflected the overlapping explanatory power of pain and non-pain predictors in modeling opioid use.

#### *Handling missing data and standardization of the variables*

Responses coded as “prefer not to answer” or “do not know” were recoded as missing values. To address missing data and minimize bias, a Bayesian ridge regression model with a median prior was used for imputation, yielding results consistent with a median-only imputation approach. Features were then standardized by centering the mean to zero and scaling the variance to one, ensuring no feature dominated due to variance magnitude. The same process—exclusion, imputation, and standardization—was applied separately to the testing dataset to avoid data leakage.

#### *Open code on Github*

For the complete code used to perform the analyses in the main text of this paper please refer to our GitHub repository at: <https://github.com/EVPlab>





## Supplementary tables and figures

|                       | Prescription opioids | Number | Percentage (%) |
|-----------------------|----------------------|--------|----------------|
| <b>Weak opioids</b>   | Combined             | 13,904 | 63.75          |
|                       | Codeine              | 2,020  | 9.26           |
|                       | Dihydrocodeine       | 1,444  | 6.62           |
|                       | Dextropropoxyphene   | 314    | 1.43           |
|                       | Meptazinol           | 61     | 0.28           |
|                       | Pethidine            | 21     | 0.09           |
| <b>Strong opioids</b> | Tramadol             | 4,646  | 21.3           |
|                       | Morphine             | 360    | 1.65           |
|                       | Buprenorphine        | 306    | 1.40           |
|                       | Fentanyl             | 220    | 1              |
|                       | Oxycodone            | 166    | 0.76           |

**Supplementary Table 1** Regular prescription opioids reported by the chronic non-cancer pain patients. Combined opioids comprise opioids in combination with a non-opioid analgesic.

### Health Conditions' Co-occurrences and Opioid Use in the UKBB

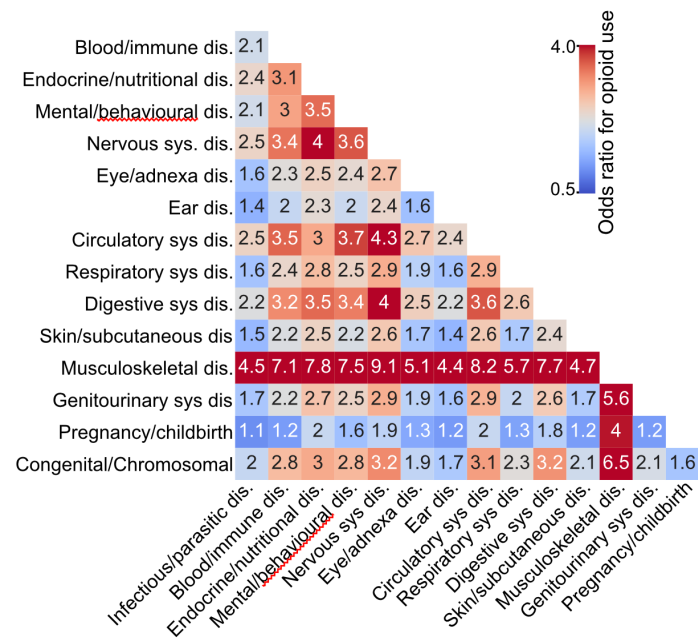

**Supplementary Figure 1.** Heatmap shows the co-occurrence of diagnoses for opioid use. ORs are calculated for opioid use at the co-occurrence of two major categories compared to opioid use at other categories. The odds of opioid use were highest among participants with musculoskeletal disorders, but were also elevated for other conditions, including nervous system and digestive system disorders.

|                                        | UKBB                          |                             |
|----------------------------------------|-------------------------------|-----------------------------|
|                                        | No opioid use<br>(n = 79,764) | Opioid Users<br>(n = 1,534) |
| <b>Sex</b>                             |                               |                             |
| Female                                 | 40,110 (50.3%)                | 893 (58.2%)                 |
| Male                                   | 39,654 (49.17)                | 641 (41.8%)                 |
| <b>Age</b>                             |                               |                             |
| Mean (SD)                              | 55.87 (8.30)                  | 59.1 (7.95)                 |
| Median [Min, Max]                      | 56.3 [38.8, 71.2]             | 60.9 [40.5, 70.3]           |
| <b>Ethnicity</b>                       |                               |                             |
| White                                  | 73,893 (92.6%)                | 1,432 (93.4%)               |
| Asian                                  | 2,391 (3.0%)                  | 29 (1.9%)                   |
| Black                                  | 1,752 (2.2%)                  | 42 (2.7%)                   |
| Other                                  | 944 (1.2%)                    | 16 (1.0%)                   |
| Mixed                                  | 546 (0.7%)                    | 7 (0.5%)                    |
| Missing                                | 238 (0.3%)                    | 8 (0.5%)                    |
| <b>Education</b>                       |                               |                             |
| <sup>a</sup> Higher education          | 31,162 (39.1%)                | 362 (23.6%)                 |
| <sup>b</sup> Vocational/Post-secondary | 5,364 (6.7%)                  | 122 (8.0%)                  |
| <sup>c</sup> Secondary                 | 30,083 (37.7%)                | 506 (33.0%)                 |
| None                                   | 11,776 (14.8%)                | 501 (32.7%)                 |
| Missing                                | 1,379 (1.7%)                  | 43 (2.8%)                   |
| <b>Employment</b>                      |                               |                             |
| Employed                               | 51,408 (64.5%)                | 619 (40.4%)                 |
| Retired                                | 22,166 (27.8%)                | 666 (43.4%)                 |
| Unable to work-Sickness/Disability     | 1,204 (1.5%)                  | 154 (10.0%)                 |
| <sup>d</sup> Unemployed                | 4,249 (5.3%)                  | 77 (5.0%)                   |
| None of above                          | 465 (0.6%)                    | 9 (0.6%)                    |
| Missing                                | 272 (0.3%)                    | 9 (0.6%)                    |
| <b><sup>e</sup>Household income</b>    |                               |                             |
| Low                                    | 30,205 (37.9%)                | 824 (53.7%)                 |
| Middle                                 | 34,111 (42.8%)                | 357 (23.3%)                 |
| High                                   | 4,058 (5.1%)                  | 25 (1.6%)                   |
| Prefer not to answer                   | 7,711 (9.7%)                  | 190 (12.4%)                 |
| Missing                                | 3,679 (4.6%)                  | 138 (9.0%)                  |
| <b>Acute pain type</b>                 |                               |                             |
| Back pain                              | 27,257 (34.2%)                | 543 (35.4%)                 |
| Knee pain                              | 15,375 (19.3%)                | 310 (20.2%)                 |
| Neck/shoulder pain                     | 21,735 (27.2%)                | 416 (27.1%)                 |
| Headaches                              | 27,984 (35.1%)                | 516 (33.6%)                 |
| Hip pain                               | 6,281 (7.9%)                  | 193 (12.6%)                 |
| Stomach/abdominal pain                 | 9,816 (12.3%)                 | 206 (13.4%)                 |
| Facial pain                            | 1,917 (2.4%)                  | 48 (3.1%)                   |
| Widespread pain                        | 1,478 (1.9%)                  | 120 (7.8%)                  |

<sup>a</sup>Higher education refers to college or university degree and other professional qualifications in the UKBB. <sup>b</sup>Vocational/post-secondary education includes NVQs, HNDs, HNCs, or their equivalents in the UKBB. <sup>c</sup>Secondary education includes A levels/ AS levels, O levels/ GCSEs or equivalent, and CSEs or equivalent in the UKBB. <sup>d</sup>Unemployed individuals include unemployed, taking care of home and/or family, unpaid or voluntary work, or full- or part-time students. <sup>e</sup>Income levels are classified as follows: low including less than £18,000 or between £18,000 and £30,999, middle including £31,000 to £51,999 and £52,000 to £100,000; and high referring to more than £100,000 per year in the UKBB.

**Supplementary Table 2.** Characteristics of participants in the UK Biobank (UKBB) stratified by opioid use in participants with acute pain. Mean, standard deviation (SD), and median are reported for the continuous variables (Age and BMI), and percentages are reported for categorical variables. Missing data are noted where applicable.

**a | Model performance in patients with acute Pain**

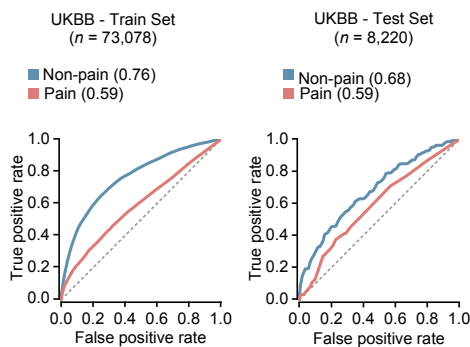

**b | Feature structure coefficients - patients with acute pain**

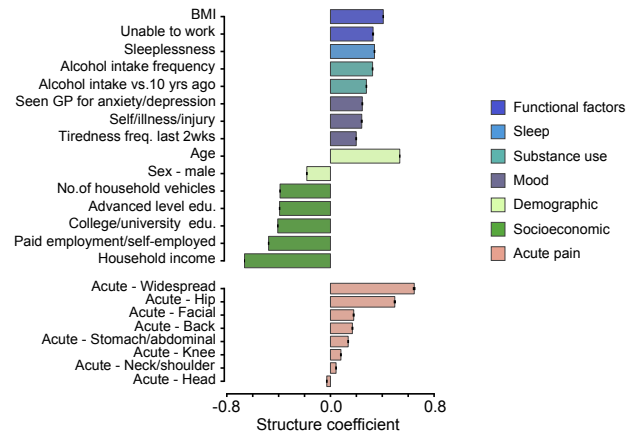

**c | Domain-level pseudo R<sup>2</sup>**

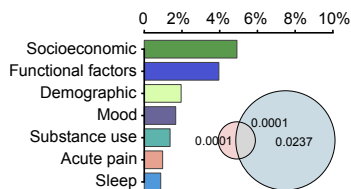

**Supplementary Figure 2.** Non-pain and pain models predicting opioid use in patients with acute pain. **a)** Receiver Operating Characteristic (ROC) curves display the classification performance of two LASSO logistic regression models: a pain model and a non-pain model, evaluated on the UKBB training set (left), test set (right). The models were trained to predict opioid use based on domain-specific features, with feature selection determined by non-zero LASSO coefficients following regularization. **b)** structure coefficients show the univariate associations between each feature and the model prediction. **c)** Domain-level variance explained (pseudo R<sup>2</sup>) is shown for each feature category in the non-pain model (eight domains) and the corresponding pain-related domains (chronic and acute pain). Adjacent Venn diagrams illustrate the proportion of deviance explained (D<sup>2</sup>) uniquely by the non-pain (blue, right circle) and pain (pink, left circle) feature sets, as well as the shared variance (overlap).

| Feature                 | Associated Question                                                                                                                                                                                                                                                             | UK Biobank data field |
|-------------------------|---------------------------------------------------------------------------------------------------------------------------------------------------------------------------------------------------------------------------------------------------------------------------------|-----------------------|
| Age                     | Age when attended assessment center                                                                                                                                                                                                                                             | 21003                 |
| Sex                     | Sex of participant                                                                                                                                                                                                                                                              | 31                    |
| Body Mass Index (BMI)   | Body Mass Index (BMI)                                                                                                                                                                                                                                                           | 21001                 |
| Ethnicity White         | Ethnic background                                                                                                                                                                                                                                                               | 21000                 |
| Ethnicity Mixed         | Ethnic background                                                                                                                                                                                                                                                               | 21000                 |
| Ethnicity Asian         | Ethnic background                                                                                                                                                                                                                                                               | 21000                 |
| Ethnicity Black         | Ethnic background                                                                                                                                                                                                                                                               | 21000                 |
| Ethnicity Other         | Ethnic background                                                                                                                                                                                                                                                               | 21000                 |
| Number In Household     | Including yourself, how many people are living together in your household? (Include those who usually live in the house such as students living away from home during term, partners in the armed forces or professions such as pilots)                                         | 709                   |
| Live With Partner       | How are the other people who live with you related to you? (You can select more than one answer) ( <b>1=Husband, wife or partner</b> , 2=Son and/or daughter, 3=Brother and/or sister, 4=Mother and/or father, 5=Grandparent, 6=Grandchild, 7=Other related, 8=Other unrelated) | 6141                  |
| Live With Children      | How are the other people who live with you related to you? (You can select more than one answer) (1=Husband, wife or partner, <b>2= son and/or daughter</b> , 3=Brother and/or sister, 4=mother and/or father, 5=Grandparent, 6=Grandchild, 7=Other related, 8=Other unrelated) | 6141                  |
| Live With Sibling       | How are the other people who live with you related to you? (You can select more than one answer) (1=Husband, wife or partner, 2= son and/or daughter, <b>3=Brother and/or sister</b> , 4=mother and/or father, 5=Grandparent, 6=Grandchild, 7=Other related, 8=Other unrelated) | 6141                  |
| Live With Parent        | How are the other people who live with you related to you? (You can select more than one answer) (1=Husband, wife or partner, 2= son and/or daughter, 3=Brother and/or sister, <b>4=mother and/or father</b> , 5=Grandparent, 6=Grandchild, 7=Other related, 8=Other unrelated) | 6141                  |
| Live With Grandparent   | How are the other people who live with you related to you? (You can select more than one answer) (1=Husband, wife or partner, 2= son and/or daughter, 3=Brother and/or sister, 4=mother and/or father, <b>5=Grandparent</b> , 6=Grandchild, 7=Other related, 8=Other unrelated) | 6141                  |
| Live With Grandchild    | How are the other people who live with you related to you? (You can select more than one answer) (1=Husband, wife or partner, 2= son and/or daughter, 3=Brother and/or sister, 4=mother and/or father, 5=Grandparent, <b>6=Grandchild</b> , 7=Other related, 8=Other unrelated) | 6141                  |
| Live With Other Related | How are the other people who live with you related to you? (You can select more than one answer) (1=Husband, wife or partner, 2 son and/or daughter,                                                                                                                            | 6141                  |

|                                                                |                                                                                                                                                                                                                                                                                                                                                       |        |
|----------------------------------------------------------------|-------------------------------------------------------------------------------------------------------------------------------------------------------------------------------------------------------------------------------------------------------------------------------------------------------------------------------------------------------|--------|
|                                                                | 3=Brother and/or sister, 4=mother and/or father, 5=Grandparent, 6=Grandchild, <b>7=Other related</b> , 8=Other unrelated)                                                                                                                                                                                                                             |        |
| Live With Other Unrelated                                      | How are the other people who live with you related to you? (You can select more than one answer) (1=Husband, wife or partner, 2 son and/or daughter, 3=Brother and/or sister, 4=mother and/or father, 5=Grandparent, 6=Grandchild, 7=Other related, <b>8=Other unrelated</b> )                                                                        | 6141   |
| Number Vehicles Household                                      | How are the other people who live with you related to you? (You can select more than one answer)                                                                                                                                                                                                                                                      | 6141   |
| Income Household Pre Tax                                       | What is the average total income before tax received by your HOUSEHOLD? (1=Less than 18,000, 2=18,000-30,999, 3=31,000-51,999, 4=52,000-100,000, 5=Greater than 100,000)                                                                                                                                                                              | 100295 |
| Current employment status: Paid Employment or Self Employed    | Which of the following describes your current situation? (You can select more than one answer) ( <b>1=In paid employment or self-employed</b> , 2=Retired, 3=Looking after home and/or family, 4=Unable to work because of sickness or disability, 5=Unemployed, 6=Doing unpaid or voluntary work, 7=Full or part-time student, -7=None of the above) | 100295 |
| Current employment status: Retired                             | Which of the following describes your current situation? (You can select more than one answer) (1=In paid employment or self-employed, <b>2=Retired</b> , 3=Looking after home and/or family, 4=Unable to work because of sickness or disability, 5=unemployed, 6=Doing unpaid or voluntary work, 7=Full or part-time student, -7=None of the above)  | 100295 |
| Current employment status: Look After Home Family              | Which of the following describes your current situation? (You can select more than one answer) (1=In paid employment or self-employed, 2=Retired, <b>3=Looking after home and/or family</b> , 4=Unable to work because of sickness or disability, 5=unemployed, 6=Doing unpaid or voluntary work, 7=Full or part-time student, -7=None of the above)  | 100295 |
| Current employment status: Unable Work Due Sickness Disability | Which of the following describes your current situation? (You can select more than one answer) (1=In paid employment or self-employed, 2=Retired, 3=Looking after home and/or family, <b>4=Unable to work because of sickness or disability</b> , 5=unemployed, 6=Doing unpaid or voluntary work, 7=Full or part-time student, -7=None of the above)  | 100295 |
| Current employment status: Unemployed                          | Which of the following describes your current situation? (You can select more than one answer) (1=In paid employment or self-employed, 2=Retired, 3=Looking after home and/or family, 4=Unable to work because of sickness or disability, <b>5=unemployed</b> , 6=Doing unpaid or voluntary work, 7=Full or part-time student, -7=None of the above)  | 100295 |
| Current employment status: Voluntary Work                      | Which of the following describes your current situation? (You can select more than one answer) (1=In paid employment or self-employed, 2=Retired, 3=Looking after home and/or family, 4=Unable to work because of                                                                                                                                     | 100295 |

|                                                        |                                                                                                                                                                                                                                                                                                                                                              |        |
|--------------------------------------------------------|--------------------------------------------------------------------------------------------------------------------------------------------------------------------------------------------------------------------------------------------------------------------------------------------------------------------------------------------------------------|--------|
|                                                        | sickness or disability, 5=unemployed, <b>6=Doing unpaid or voluntary work</b> ,7=Full or part-time student, -7=None of the above)                                                                                                                                                                                                                            |        |
| Current employment status: Full Part Time Student      | Which of the following describes your current situation? (You can select more than one answer) (1=In paid employment or self-employed, 2=Retired,3=Looking after home and/or family, 4=Unable to work because of sickness or disability, 5=unemployed, 6=Doing unpaid or voluntary work, <b>7=Full or part-time student</b> , -7=None of the above)          | 100295 |
| Current employment status: None Of Employment Proposed | Which of the following describes your current situation? (You can select more than one answer) (1=In paid employment or self-employed, <b>2=Retired</b> , 3=Looking after home and/or family, 4=Unable to work because of sickness or disability, 5=unemployed, 6=Doing unpaid or voluntary work, 7=Full or part-time student, <b>-7=None of the above</b> ) | 100295 |
| Education: College or University                       | Which of the following qualifications do you have? (You can select more than one) ( <b>1=College or University degree</b> , 2=A levels/AS level or equivalent, 3=O Levels/GCSEs or equivalent, 4 = Other Professional Qualifications)                                                                                                                        | 100305 |
| Education: Advanced Level                              | Which of the following qualifications do you have? (You can select more than one) (1=College or University degree, <b>2=A levels/AS level or equivalent</b> , 3=O Levels/GCSEs or equivalent, 4=Cses or equivalent, 5=Nvq or HND or HNC or equivalent, 6=Other Professional Qualifications)                                                                  | 100305 |
| Education: Ordinary Level                              | Which of the following qualifications do you have? (You can select more than one) (1=College or University degree, 2=A levels/AS level or equivalent, <b>3=O Levels/GCSEs or equivalent</b> , 4=Cses or equivalent, 5=Nvq or HND or HNC or equivalent, 6=Other Professional Qualifications)                                                                  | 100305 |
| Education: Certificate Secondary Education             | Which of the following qualifications do you have? (You can select more than one) (1=College or University degree, 2=A levels/AS level or equivalent, 3=O Levels/GCSEs or equivalent, <b>4=Cses or equivalent</b> , 5=Nvq or HND or HNC or equivalent, 6=Other Professional Qualifications)                                                                  | 100305 |
| Education: Practical Career Diploma                    | Which of the following qualifications do you have? (You can select more than one) (1=College or University degree, 2=A levels/AS level or equivalent, 3=O Levels/GCSEs or equivalent, 4=Cses or equivalent, <b>5=Nvq or HND or HNC or equivalent</b> , 6=Other Professional Qualifications)                                                                  | 100305 |
| Education: Other Professional Qualification            | Which of the following qualifications do you have? (You can select more than one) (1=College or University degree, 2=A levels/AS level or equivalent, 3=O Levels/GCSEs or equivalent, 4=Cses or equivalent 5=Nvq or HND or HNC or equivalent, <b>6=Other Professional Qualifications</b> )                                                                   | 100305 |
| Sleep Duration                                         | About how many hours sleep do you get in every 24 hours? (please include naps)                                                                                                                                                                                                                                                                               | 1160   |

|                              |                                                                                                                                                                                                                                                                                                             |       |
|------------------------------|-------------------------------------------------------------------------------------------------------------------------------------------------------------------------------------------------------------------------------------------------------------------------------------------------------------|-------|
| Nap During Day               | Do you have a nap during the day? (1=Never/rarely, 2=Sometimes, 3=Usually)                                                                                                                                                                                                                                  | 1190  |
| Difficulty Waking Up         | On an average day, how easy do you find getting up in the morning? (1=Not at all easy, 2=Not very easy, 3=fairly easy, 4=Very easy)                                                                                                                                                                         | 1170  |
| Late Chronotype              | Do you consider yourself to be? (1=Definitely a 'morning' person, 2=More of a 'morning' than 'evening' person, 3=More an 'evening' than a 'morning' person, 4=Definitely an 'evening' person)                                                                                                               | 1180  |
| Sleeplessness                | Do you have trouble falling asleep at night or do you wake up in the middle of the night? (1=Never/rarely, 2=Sometimes, 3=Usually)                                                                                                                                                                          | 1200  |
| Narcolepsy                   | "How likely are you to doze off or fall asleep during the daytime when you don't mean to? (e.g. when working, reading or driving)" (0=Never/rarely, 1=Sometimes, 2=Often, 3=All of the time)                                                                                                                | 1220  |
| Ever Smoked                  | "Current tobacco smoking" ( <a href="#">Field 1239</a> ) and "Past tobacco smoking" ( <a href="#">Field 1249</a> ).<br>Individual classed as Ever smoker if Current tobacco smoking=Most days (1) or occasionally (2) OR Past tobacco smoking=Most days (1) or occasionally (2) or tried once or twice (3). | 20160 |
| Daily Smoker                 | Do you smoke tobacco now? ( <b>1=Yes, on most or all days</b> , 2=Only occasionally, 0=No)                                                                                                                                                                                                                  | 1239  |
| Occasional Smoker            | Do you smoke tobacco now? (1=Yes, on most or all days, <b>2=Only occasionally</b> , 0=No)                                                                                                                                                                                                                   | 1239  |
| Previous Smoker              | Smoking status (0=Never, 1=Previous, 2=Current)                                                                                                                                                                                                                                                             | 20116 |
| Past Tobacco Smoking         | In the past, how often have you smoked tobacco? (1=Smoked on most days, 2=Smoked occasionally, 3=Just tried once or twice, 4=I have never smoked)                                                                                                                                                           | 1249  |
| Smoking Household            | Does anyone in your household smoke? (1=Yes, one household member smokes, 2=Yes, more than one household member smokes, 0=No)                                                                                                                                                                               | 1259  |
| Exposure Tobacco Home        | At home, about how many hours per WEEK are you exposed to other people's tobacco smoke?                                                                                                                                                                                                                     | 1269  |
| Alcohol Intake Frequency     | About how often do you drink alcohol? (1=Daily or almost daily, 2=Three or four times a week, 3=Once or twice a week, 4=One to three times a month, 5=Special occasions only, 6=Never)                                                                                                                      | 1558  |
| Alcohol Intake Versus 10 Yrs | Compared to 10 years ago, do you drink? (1=More nowadays, 2=About the same, 3=Less nowadays_                                                                                                                                                                                                                | 1628  |
| Previous Drinker             | Alcohol drinker status<br>(0=Never, <b>1=Previous</b> , 2=Current)                                                                                                                                                                                                                                          | 20117 |
| Never Drank                  | Alcohol drinker status<br>( <b>0=Never</b> , 1=Previous, 2=Current)                                                                                                                                                                                                                                         | 20117 |
| Total Neuroticism            | Derived from the 12 neurotic behaviors as a sum score of the total "yes" answers to these questions                                                                                                                                                                                                         | 20127 |
| Mood Swings                  | Does your mood often go up and down? (Yes/No)                                                                                                                                                                                                                                                               | 1920  |



|                                      |                                                                                                                                                                                                                                                                                                                                                |      |
|--------------------------------------|------------------------------------------------------------------------------------------------------------------------------------------------------------------------------------------------------------------------------------------------------------------------------------------------------------------------------------------------|------|
| Miserableness                        | Do you ever feel 'just miserable' for no reason? (Yes/No)                                                                                                                                                                                                                                                                                      | 1930 |
| Irritability                         | Are you an irritable person? (Yes/No)                                                                                                                                                                                                                                                                                                          | 1940 |
| Sensitivity Hurt Feelings            | Are your feelings easily hurt? (Yes/No)                                                                                                                                                                                                                                                                                                        | 1950 |
| Fed Up Feelings                      | Do you often feel 'fed-up'? (Yes/No)                                                                                                                                                                                                                                                                                                           | 1960 |
| Nervous Feelings                     | Would you call yourself a nervous person? (Yes/No)                                                                                                                                                                                                                                                                                             | 1970 |
| Worry Anxious Feelings               | Do you worry too long after an embarrassing experience? (Yes/No)                                                                                                                                                                                                                                                                               | 1980 |
| Tense Strung                         | Would you call yourself tense or 'highly strung'? (Yes/No)                                                                                                                                                                                                                                                                                     | 1990 |
| Worry Long After Embarrassment       | Do you worry too long after an embarrassing experience? (Yes/No)                                                                                                                                                                                                                                                                               | 2000 |
| Suffer From Nerves                   | Do you suffer from 'nerves'? (Yes/No)                                                                                                                                                                                                                                                                                                          | 2010 |
| Loneliness Isolation                 | Do you often feel lonely? (Yes/No)                                                                                                                                                                                                                                                                                                             | 2020 |
| Guilty Feelings                      | Are you often troubled by feelings of guilt? (Yes/No)                                                                                                                                                                                                                                                                                          | 2030 |
| Risk Taking                          | Would you describe yourself as someone who takes risks? (Yes/No)                                                                                                                                                                                                                                                                               | 2040 |
| Frequency Depressed Mood 2 Weeks     | Over the past two weeks, how often have you felt down, depressed or hopeless? (1=Not at all, 2=Several days, 3=More than half the days, 4=Nearly every day)                                                                                                                                                                                    | 2050 |
| Frequency Disinterest Last 2 Weeks   | Over the past two weeks, how often have you had little interest or pleasure in doing things? (1=Not at all, 2=Several days, 3=More than half the days, 4=Nearly every day)                                                                                                                                                                     | 2060 |
| Frequency Restlessness Last 2 Weeks  | Over the past two weeks, how often have you felt tense, fidgety or restless? (1=Not at all, 2=Several days, 3=More than half the days, 4=Nearly every day)                                                                                                                                                                                     | 2070 |
| Frequency Tiredness Last 2 Weeks     | Over the past two weeks, how often have you felt tired or had little energy? (1=Not at all, 2=Several days, 3=More than half the days, 4=Nearly every day)                                                                                                                                                                                     | 2080 |
| Seen GP Anxiety Depression           | Have you ever seen a general practitioner (GP) for nerves, anxiety, tension, or depression? (Yes/No)                                                                                                                                                                                                                                           | 2090 |
| Seen Psychiatrist Anxiety Depression | Have you ever seen a psychiatrist for nerves, anxiety, tension, or depression? (Yes/No)                                                                                                                                                                                                                                                        | 2100 |
| Illness Injury Assault Other         | In the last 2 years have you experienced any of the following? (You can select more than one answer) (1=Serious illness, injury or assault to yourself, <b>2=Serious illness, injury or assault of a close relative</b> , 3=Death of a close relative, 4=Death of a spouse or partner, 5=Marital separation/divorce, 6=Financial difficulties) | 6145 |
| Illness Injury Assault Self          | In the last 2 years have you experienced any of the following? (You can select more than one answer) ( <b>1=Serious illness, injury or assault to yourself</b> ,                                                                                                                                                                               | 6145 |

|                                |                                                                                                                                                                                                                                                                                                                                                |      |
|--------------------------------|------------------------------------------------------------------------------------------------------------------------------------------------------------------------------------------------------------------------------------------------------------------------------------------------------------------------------------------------|------|
|                                | 2=Serious illness, injury or assault of a close relative, 3=Death of a close relative, 4=Death of a spouse or partner, 5=Marital separation/divorce, 6=Financial difficulties                                                                                                                                                                  |      |
| Death Spouse                   | In the last 2 years have you experienced any of the following? (You can select more than one answer) (1=Serious illness, injury or assault to yourself, 2=Serious illness, injury or assault of a close relative, 3=Death of a close relative, <b>4=Death of a spouse or partner</b> , 5=Marital separation/divorce, 6=Financial difficulties  | 6145 |
| Death Other                    | In the last 2 years have you experienced any of the following? (You can select more than one answer) (1=Serious illness, injury or assault to yourself, 2=Serious illness, injury or assault of a close relative, <b>3=Death of a close relative</b> , 4=Death of a spouse or partner, 5=Marital separation/divorce, 6=Financial difficulties  | 6145 |
| Separation Divorce             | In the last 2 years have you experienced any of the following? (You can select more than one answer) (1=Serious illness, injury or assault to yourself, 2=Serious illness, injury or assault of a close relative, 3=Death of a close relative, 4=Death of a spouse or partner, <b>5=Marital separation/divorce</b> , 6=Financial difficulties) | 6145 |
| Financial Difficulties         | In the last 2 years have you experienced any of the following? (You can select more than one answer) (1=Serious illness, injury or assault to yourself, 2=Serious illness, injury or assault of a close relative, 3=Death of a close relative, 4=Death of a spouse or partner, 5=Marital separation/divorce, <b>6=Financial difficulties</b> ) | 6145 |
| Chronic Widespread Pain        | Have you had pains all over the body for more than 3 months? (Yes/No)                                                                                                                                                                                                                                                                          | 2956 |
| Chronic Neck Shoulder Pain     | Have you had neck or shoulder pains for more than 3 months? (Yes/No)                                                                                                                                                                                                                                                                           | 3404 |
| Chronic Hip Pain               | Have you had hip pains for more than 3 months? (Yes/No)                                                                                                                                                                                                                                                                                        | 3414 |
| Chronic Back Pain              | Have you had back pains for more than 3 months? (Yes/No)                                                                                                                                                                                                                                                                                       | 3571 |
| Chronic Stomach Abdominal Pain | Have you had stomach or abdominal pains for more than 3 months? (Yes/No)                                                                                                                                                                                                                                                                       | 3741 |
| Chronic Knee Pain              | Have you had knee pains for more than 3 months? (Yes/No)                                                                                                                                                                                                                                                                                       | 3773 |
| Chronic Headaches              | Have you had headaches for more than 3 months? (Yes/No)                                                                                                                                                                                                                                                                                        | 3799 |
| Chronic Facial Pain            | Have you had facial pains for more than 3 months? (Yes/No)                                                                                                                                                                                                                                                                                     | 4067 |
| Acute Neck Shoulder Pain       | In the last month have you experienced any of the following that interfered with your usual activities? (You can select more than one answer) (1=Headache, 2=Facial pain, <b>3=Neck or shoulder pain</b> , 4=Back pain, 5=Stomach or abdominal pain, 6=Hip pain, 7=Knee pain, 8=Pain all over the above)                                       | 6159 |

|                                 |                                                                                                                                                                                                                                                                                                              |      |
|---------------------------------|--------------------------------------------------------------------------------------------------------------------------------------------------------------------------------------------------------------------------------------------------------------------------------------------------------------|------|
| Acute Hip Pain                  | In the last month have you experienced any of the following that interfered with your usual activities? (You can select more than one answer)<br>(1=Headache, 2=Facial pain, 3=Neck or shoulder pain, 4=Back pain, 5=Stomach or abdominal pain, <b>6=Hip pain</b> , 7=Knee pain, 8=Pain all over the above)  | 6159 |
| Acute Back Pain                 | In the last month have you experienced any of the following that interfered with your usual activities? (You can select more than one answer)<br>(1=Headache, 2=Facial pain, 3=Neck or shoulder pain, <b>4=Back pain</b> , 5=Stomach or abdominal pain, 6=Hip pain, 7=Knee pain, 8=Pain all over the above)  | 6159 |
| Acute Stomach<br>Abdominal Pain | In the last month have you experienced any of the following that interfered with your usual activities? (You can select more than one answer)<br>(1=Headache, 2=Facial pain, 3=Neck or shoulder pain, 4=Back pain, <b>5=Stomach or abdominal pain</b> , 6=Hip pain, 7=Knee pain, 8=Pain all over the above)  | 6159 |
| Acute Knee Pain                 | In the last month have you experienced any of the following that interfered with your usual activities? (You can select more than one answer)<br>(1=Headache, 2=Facial pain, 3=Neck or shoulder pain, 4=Back pain, 5=Stomach or abdominal pain, 6=Hip pain, <b>7=Knee pain</b> , 8=Pain all over the above)  | 6159 |
| Acute Facial Pain               | In the last month have you experienced any of the following that interfered with your usual activities? (You can select more than one answer)<br>(1=Headache, 2= <b>facial pain</b> , 3=Neck or shoulder pain, 4=Back pain, 5=Stomach or abdominal pain, 6=Hip pain, 7=Knee pain, 8=Pain all over the above) | 6159 |
| Acute Headaches                 | In the last month have you experienced any of the following that interfered with your usual activities? (You can select more than one answer)<br>( <b>1=Headache</b> , 2=Facial pain, 3=Neck or shoulder pain, 4=Back pain, 5=Stomach or abdominal pain, 6=Hip pain, 7=Knee pain, 8=Pain all over the above) | 6159 |
| Acute Widespread<br>Pain        | In the last month have you experienced any of the following that interfered with your usual activities? (You can select more than one answer)<br>(1=Headache, 2=Facial pain, 3=Neck or shoulder pain, 4=Back pain, 5=Stomach or abdominal pain, 6=Hip pain, 7=Knee pain, <b>8=Pain all over the above</b> )  | 6159 |

**Supplementary Table 3.** Features used in UK Biobank model. Question column presents question presented to participants and data coding. Each data-field refers to a fundamental block of data showing the results of a single question or a measurement in the UK Biobank repository. Feature domains: **Chronic Pain**, **Functional factors**, Socioeconomic, **Sleep**, **Mood**, **Substance use**, **Demographic**, **Neuroticism**, **Occupational**, **Acute pain**.

| Feature                                            | Associated Question                                                                                                                                                                                                                                         | All of Us Questionnaire    |
|----------------------------------------------------|-------------------------------------------------------------------------------------------------------------------------------------------------------------------------------------------------------------------------------------------------------------|----------------------------|
| Age                                                | Age at the start of study participation                                                                                                                                                                                                                     | The Basics                 |
| Sex                                                | What was your biological sex assigned at birth? (Female, Male, Intersex)                                                                                                                                                                                    | The Basics                 |
| What Race Ethnicity: Asian                         | Which categories describe you? Select all that apply. Note, you may select more than one group                                                                                                                                                              | <a href="#">The Basics</a> |
| What Race Ethnicity: Black                         | Which categories describe you? Select all that apply. Note, you may select more than one group                                                                                                                                                              | <a href="#">The Basics</a> |
| What Race Ethnicity: Hispanic                      | Which categories describe you? Select all that apply. Note, you may select more than one group                                                                                                                                                              | <a href="#">The Basics</a> |
| What Race Ethnicity: Race Ethnicity None of These  | Which categories describe you? Select all that apply. Note, you may select more than one group                                                                                                                                                              | <a href="#">The Basics</a> |
| What Race Ethnicity: White                         | Which categories describe you? Select all that apply. Note, you may select more than one group (White, Black, Hispanic, more than one, Asian, Other)                                                                                                        | <a href="#">The Basics</a> |
| Another single population                          | Which categories describe you? Select all that apply. Note, you may select more than one group                                                                                                                                                              | The Basics                 |
| More than one population                           | Which categories describe you? Select all that apply. Note, you may select more than one group                                                                                                                                                              | The Basics                 |
| Employed for wages or self-employed                | What is your current <b>employment status</b> ? Please select 1 or more of these categories. ( <b>Employed for Wages</b> , Homemaker, Out Of Work Less Than One, Out of Work One Or More, Retired, <b>Self Employed</b> , Student, Unable to Work, Student) | <a href="#">The Basics</a> |
| Not currently employed for wages                   | What is your current <b>employment status</b> ? Please select 1 or more of these categories. (Employed for Wages, Homemaker, <b>Out of Work Less Than One, Out of Work One or More, Retired, Self Employed, Student, Unable to Work</b> )                   | <a href="#">The Basics</a> |
| Highest Grade: College graduate or advanced degree | What is the highest grade or year of school you completed? (College One to Three, <b>College Graduate, Advance Degree</b> , Twelve or GED, Nine Through Eleven, Five Through Eight), One Through Four, Never Attended)                                      | <a href="#">The Basics</a> |
| Highest Grade: College One to Three                | What is the highest grade or year of school you completed? ( <b>College One to Three</b> , College Graduate, Advance Degree, Twelve or GED, Nine Through Eleven, Five Through Eight), One Through Four, Never Attended)                                     | <a href="#">The Basics</a> |
| Highest Grade: Twelve Or GED                       | What is the highest grade or year of school you completed? (College One to Three, College Graduate, Advance Degree, <b>Twelve or GED</b> , Nine Through Eleven, Five Through Eight), One Through Four, Never Attended)                                      | <a href="#">The Basics</a> |

|                                                             |                                                                                                                                                                                                                       |                     |
|-------------------------------------------------------------|-----------------------------------------------------------------------------------------------------------------------------------------------------------------------------------------------------------------------|---------------------|
| Highest Grade: Less than a high school degree or equivalent | What is the highest grade or year of school you completed? (College One to Three, College Graduate, Advance Degree, Twelve or GED, <b>Nine Through Eleven, Five Through Eight, One Through Four, Never Attended</b> ) | The Basics          |
| Alcohol: Average Daily Drink Count                          | On a typical day when you drink, how many drinks do you have? (1 or 2, 3 or 4, 5 or 6, 7 to 9, 10 or more)                                                                                                            | Lifestyle           |
| Alcohol: Drink Frequency Past Year                          | How often did you have a drink containing alcohol in the past year? (Never, Monthly or less, Two to four times a month, Two to three times a week, Four or more times a week)                                         | Lifestyle           |
| Alcohol: 6 or More Drinks Occurrence                        | How often did you have six or more drinks on one occasion in the past year? (Less than month, Monthly, Weekly, Daily or almost daily, Never in the last year)                                                         | Lifestyle           |
| Smokeless Tobacco: Smokeless Tobacco Participant            | Have you ever used smokeless tobacco products, even one or two times? (Smokeless tobacco products include snus pouches, Skoal Bandits, loose snus, moist snuff, dip, spit, and chewing tobacco.) (Yes/No)             | Lifestyle           |
| Overall Health: General Quality                             | In general, would you say your health is: (Poor, Fair, Good, Very Good, Excellent)                                                                                                                                    | Overall Health      |
| Overall Health: Average Fatigue 7 Days                      | In the past 7 days, how would you rate your fatigue? (None, Mild, Moderate, Severe, Very Severe)                                                                                                                      | Overall Health      |
| Overall Health: Emotional Problem 7 Days                    | In the past 7 days, how often have you been bothered by emotional problems such as feeling anxious, depressed or irritable? (Sometimes, Rarely, Never, Often, Always)                                                 | Overall Health      |
| Overall Health: General Physical Health                     | In general, how would you rate your physical health? (Poor, Fair, Good, Very Good, Excellent)                                                                                                                         | Overall Health      |
| Overall Health: Everyday Activities                         | To what extent are you able to carry out your everyday physical activities such as walking, climbing stairs, carrying groceries, or moving a chair? (Completely, Mostly, Moderately, A Little, Not At All)            | Overall Health      |
| Body Mass Index (BMI)                                       | Lab Measurement                                                                                                                                                                                                       | Labs & Measurements |
| Overall Health: Social Satisfaction                         | In general, how would you rate your satisfaction with your social activities and relationships? (Poor, Fair, Good, Very Good, Excellent)                                                                              | Overall Health      |
| Income: Annual Income                                       | What is your <b>annual</b> household <b>income</b> from all sources? <10k, 10k- 25k, 25k-35k, 35k-50k, 50k-75k, 75k-100k, 100k-150k, 150k-200k, >200k                                                                 | The Basics          |
| Tobacco at Home                                             | In the past month: Did someone in your home smoke tobacco/nicotine (including cigarettes, cigar, cigarillos, pipes, hookah) every day, some days, or not at all?                                                      |                     |

|                 |                                                                                                                      |                |
|-----------------|----------------------------------------------------------------------------------------------------------------------|----------------|
| Feeling Nervous | In the past 2 weeks, how often have you been bothered by the following problem? Feeling nervous, anxious, or on edge |                |
| Pain            | In the past 7 days, how would you rate your <b>pain</b> on average? (0-10)                                           | Overall Health |

**Supplementary Table 4.** Features used in the AoU model. Feature domains: **Pain Intensity**, **Functional factors**, **Socioeconomic**, **Mood**, **Substance use**, **Demographic**, **Occupational**

1. Bycroft C, Freeman C, Petkova D, Band G, Elliott LT, Sharp K, et al. The UK Biobank resource with deep phenotyping and genomic data. *Nature*. 2018;562(7726):203-9.
2. Treede R-D, Rief W, Barke A, Aziz Q, Bennett MI, Benoliel R, et al. Chronic pain as a symptom or a disease: the IASP Classification of Chronic Pain for the International Classification of Diseases (ICD-11). *pain*. 2019;160(1):19-27.
3. Santos R, Ursu O, Gaulton A, Bento AP, Donadi RS, Bologa CG, et al. A comprehensive map of molecular drug targets. *Nat Rev Drug Discov*. 2017;16(1):19-34.
4. Wu Y, Byrne E, Zheng Z, Kemper K, Yengo L, Mallett A. Genome-wide association study of medication-use and associated disease in the UK Biobank. *Nat Commun*. 2019; 10 (1): 1891. Epub 2019/04/25. <https://doi.org/10.1038/s41467-019-09572-5> PMID: 31015401; 2019.
5. Dinga R, Schmaal L, Penninx BW, Veltman DJ, Marquand AF. Controlling for effects of confounding variables on machine learning predictions. *BioRxiv*. 2020:2020.08. 17.255034.
